# Supplementary material for: Carbon fibers as three-dimensional current collectors for silicon/reduced graphene oxide lithium ion battery anodes with improved rate performance and cycle life
Source: Royal Society of Chemistry journal article supplement (doi:10.1039/c8nj01137k), 2018-01-01
Supplement: c8nj01137k1.pdf [file c8nj01137k1.pdf]

## Supplementary materials

### Carbon Fibers as Three-Dimensional Current Collectors for Silicon/Reduced Graphene Oxide Lithium Ion Battery Anode with Improved Rate Performance and Cycle Life

Chun-Han Hsu<sup>a</sup>, Heng-Han Lin<sup>b</sup>, Yi-Hung Liu<sup>b\*</sup> and Hong-Ping Lin<sup>a\*</sup>

a. Department of Chemistry, National Cheng Kung University, No.1, University road, Tainan, 70101, TAIWAN

b. Department of Greenergy, National University of Tainan, 33, Sec. 2, Shu-Lin St., Tainan, 70005, TAIWAN

\*Corresponding author: [yhliu@mail.nutn.edu.tw](mailto:yhliu@mail.nutn.edu.tw); [hplin@mail.ncku.edu.tw](mailto:hplin@mail.ncku.edu.tw)

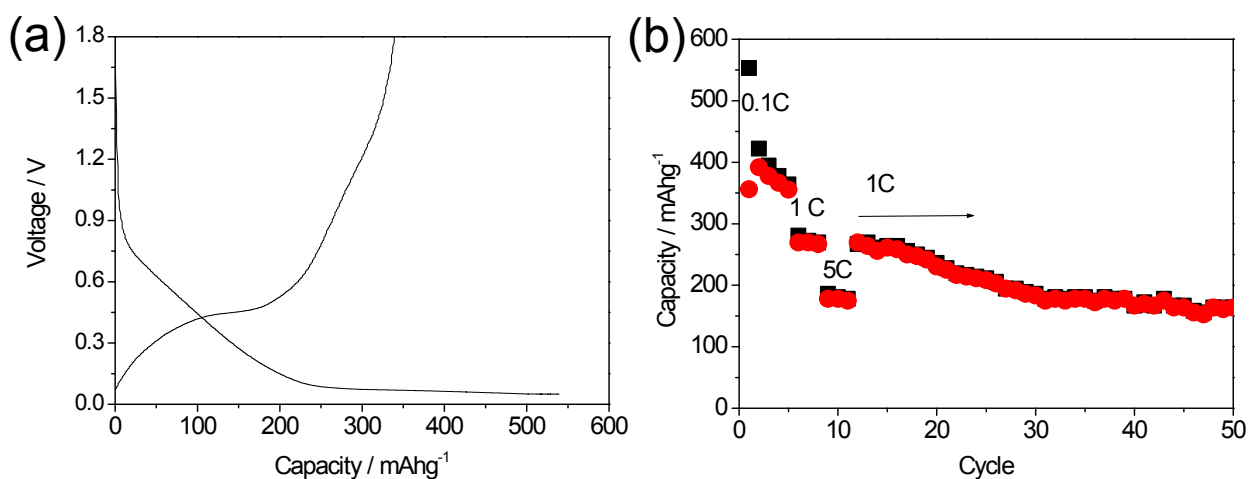

**Fig. S1.** (a) 1<sup>st</sup> charge-discharge curves; and (b) rate performance in cycle life test of Si/r-GO composite on Cu foil with electrode loading of 2.5 mg cm<sup>-2</sup>.
